# Supplementary material for: Leptin produced by obese adipose stromal/stem cells enhances proliferation and metastasis of estrogen receptor positive breast cancers
Source: Springer Nature journal article supplement (doi:10.1186/s13058-015-0622-z), 2015-08-18
Supplement: MOESM3 [file 9781534]

| MCF7 cells after co-culture with ASCs |                  |                           |                          |                           |                          |
|---------------------------------------|------------------|---------------------------|--------------------------|---------------------------|--------------------------|
| <i>Function</i>                       | <i>Gene Name</i> | ctrl shRNA <i>In</i> ASCs | lep shRNA <i>In</i> ASCs | ctrl shRNA <i>ob</i> ASCs | lep shRNA <i>ob</i> ASCs |
| Cell Cycle and Apoptosis              | <i>CDKN2A</i>    | 3.6                       | 4.8                      | 22.2 <sup>‡</sup>         | 11.6*                    |
|                                       | <i>GSTP1</i>     | 19.2*                     | 20.7*                    | 284.5 <sup>‡</sup>        | 15.4*                    |
|                                       | <i>SFRP1</i>     | 10.2*                     | 1.0                      | 74.4 <sup>‡</sup>         | 19.9*                    |
| Angiogenesis                          | <i>PLAU</i>      | 1.4                       | 1.3                      | 5.9 <sup>‡</sup>          | 2.1                      |
|                                       | <i>THBS1</i>     | 16.4*                     | 13.8*                    | 20.9*                     | 15.5*                    |
|                                       | <i>CSF</i>       | 16.4 <sup>#</sup>         | 0.3                      | 20.9 <sup>‡</sup>         | 15.5                     |
| EMT and Metastasis                    | <i>SERPINE1</i>  | 26.2*                     | 29.9*                    | 3624.0 <sup>‡</sup>       | 9.2*                     |
|                                       | <i>MMP2</i>      | 124.9                     | 109.3                    | 2895.0 <sup>‡</sup>       | 105.7                    |
|                                       | <i>IL-6</i>      | 3.2                       | 5.5                      | 17.6 <sup>‡</sup>         | 7.6                      |
|                                       | <i>TWIST1</i>    | 2.1                       | 0.8                      | 91.2 <sup>‡</sup>         | 2.0                      |
|                                       | <i>PTGS2</i>     | 3.2                       | 9.5                      | 81.0 <sup>‡</sup>         | 54.5 <sup>#</sup>        |
|                                       | <i>SNAI2</i>     | 2.2                       | 4.2                      | 517.0 <sup>‡</sup>        | 4.2                      |
