# Supplementary material for: Leptin produced by obese adipose stromal/stem cells enhances proliferation and metastasis of estrogen receptor positive breast cancers
Source: Springer Nature journal article supplement (doi:10.1186/s13058-015-0622-z), 2015-08-18
Supplement: MOESM4 [file 9781534]

| ZR75 cells after co-culture with ASCs |                  |                           |                          |                           |                          |
|---------------------------------------|------------------|---------------------------|--------------------------|---------------------------|--------------------------|
| <i>Function</i>                       | <i>Gene Name</i> | ctrl shRNA <i>In</i> ASCs | lep shRNA <i>In</i> ASCs | ctrl shRNA <i>ob</i> ASCs | lep shRNA <i>ob</i> ASCs |
| Cell Cycle and Apoptosis              | <i>CDKN2A</i>    | 2.4                       | 1.9                      | 10.2 <sup>#</sup>         | 2.3                      |
|                                       | <i>GSTP1</i>     | 3.3                       | 3.1                      | 0.8                       | 4.0                      |
|                                       | <i>SFRP1</i>     | 8.3*                      | 3.1                      | 50.3 <sup>#</sup>         | 14.2*                    |
| Angiogenesis                          | <i>PLAU</i>      | 1.4                       | 1.9                      | 2.3*                      | 1.2                      |
|                                       | <i>THBS1</i>     | 1.2                       | 1.6                      | 2.3*                      | 0.9                      |
|                                       | <i>CSF</i>       | 1.4                       | 1.4                      | 2.3                       | 1.9                      |
| EMT and Metastasis                    | <i>SERPINE1</i>  | 14.9*                     | 12.0*                    | 204.0 <sup>#</sup>        | 9.4*                     |
|                                       | <i>MMP2</i>      | 2.1                       | 3.0                      | 1845.9 <sup>‡</sup>       | 10.3                     |
|                                       | <i>IL-6</i>      | 4.2                       | 3.3                      | 20.3 <sup>‡</sup>         | 10.2*                    |
|                                       | <i>TWIST1</i>    | 3.5                       | 2.6                      | 15.0*                     | 2.5                      |
|                                       | <i>PTGS2</i>     | 1.3                       | 1.1                      | 2.3                       | 2.1                      |
|                                       | <i>SNAI2</i>     | 1.3                       | 2.1                      | 10.3                      | 5.1                      |
