# Supplementary material for: Leptin produced by obese adipose stromal/stem cells enhances proliferation and metastasis of estrogen receptor positive breast cancers
Source: Springer Nature journal article supplement (doi:10.1186/s13058-015-0622-z), 2015-08-18
Supplement: MOESM5 [file 9781534]

| T47D cells after co-culture with ASCs |                  |                           |                          |                           |                          |
|---------------------------------------|------------------|---------------------------|--------------------------|---------------------------|--------------------------|
| <i>Function</i>                       | <i>Gene Name</i> | ctrl shRNA <i>In</i> ASCs | lep shRNA <i>In</i> ASCs | ctrl shRNA <i>ob</i> ASCs | lep shRNA <i>ob</i> ASCs |
| Cell Cycle and Apoptosis              | <i>CDKN2A</i>    | 2.8                       | 2.7                      | 1.5                       | 1.9                      |
|                                       | <i>GSTP1</i>     | 1.7                       | 1.4                      | 15.6*                     | 30.4*                    |
|                                       | <i>SFRP1</i>     | 4.0                       | 0.6                      | 0.7                       | 0.7                      |
| Angiogenesis                          | <i>PLAU</i>      | 0.4                       | 0.3                      | 0.5                       | 0.4                      |
|                                       | <i>THBS1</i>     | 0.3                       | 0.3                      | 0.5                       | 0.3                      |
|                                       | <i>CSF</i>       | 0.3                       | 0.3                      | 0.5                       | 0.3                      |
| EMT and Metastasis                    | <i>SERPINE1</i>  | 15.8*                     | 15.3*                    | 222.0 <sup>#</sup>        | 17.6*                    |
|                                       | <i>MMP2</i>      | 3.8                       | 2.9                      | 2193.0 <sup>‡</sup>       | 2.6                      |
|                                       | <i>IL-6</i>      | 2.2                       | 2.2                      | 14.0 <sup>‡</sup>         | 9.0*                     |
|                                       | <i>TWIST1</i>    | 5.6                       | 4.2                      | 19.6*                     | 2.3                      |
|                                       | <i>PTGS2</i>     | 0.0                       | 0.1                      | 0.0                       | 0.0                      |
|                                       | <i>SNAI2</i>     | 0.3                       | 0.6                      | 0.4                       | 0.3                      |
