# Supplementary material for: Leptin produced by obese adipose stromal/stem cells enhances proliferation and metastasis of estrogen receptor positive breast cancers
Source: Springer Nature journal article supplement (doi:10.1186/s13058-015-0622-z), 2015-08-18
Supplement: MOESM6 [file 9781534]

| <i>Function</i>          | <i>Gene Name</i> | Xenografts of MCF7 cells co-injected with |                          |
|--------------------------|------------------|-------------------------------------------|--------------------------|
|                          |                  | ctrl shRNA <i>ob</i> ASCs                 | lep shRNA <i>ob</i> ASCs |
| Cell Cycle and Apoptosis | <i>CDKN2A</i>    | 1.7                                       | 1.6                      |
|                          | <i>GSTP1</i>     | 1.2                                       | 1.4                      |
|                          | <i>SFRP1</i>     | 0.8                                       | 1.3                      |
| Angiogenesis             | <i>PLAU</i>      | 2.0                                       | 0.8                      |
|                          | <i>THBS1</i>     | 3.0                                       | 3.0                      |
|                          | <i>CSF</i>       | 10.4 <sup>*</sup>                         | 3.4 <sup>#</sup>         |
| EMT and Metastasis       | <i>SERPINE1</i>  | 5.6 <sup>‡</sup>                          | 2.8 <sup>#</sup>         |
|                          | <i>MMP2</i>      | 2.8 <sup>‡</sup>                          | 1.4 <sup>#</sup>         |
|                          | <i>IL-6</i>      | 3.3                                       | 3.5                      |
|                          | <i>TWIST1</i>    | 0.3                                       | 0.6                      |
|                          | <i>PTGS2</i>     | 4.5                                       | 3.2                      |
|                          | <i>SNAI2</i>     | 13.8 <sup>#</sup>                         | 9.0 <sup>*</sup>         |
